# Supplementary material for: Tumour-intrinsic endomembrane trafficking by ARF6 shapes an immunosuppressive microenvironment that drives melanomagenesis and response to checkpoint blockade therapy
Source: PubMed Central journal article supplement — Nat Commun. 2024 Aug 4;15:6613. doi: 10.1038/s41467-024-50881-1 (PMC11298541; doi:10.1038/s41467-024-50881-1), 2024-08-04
Supplement: 41467_2024_50881_MOESM1_ESM.pdf [file 41467_2024_50881_MOESM1_ESM.pdf]

**a**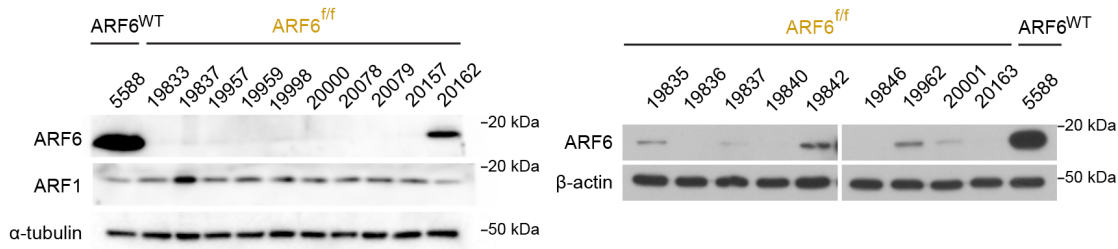**b**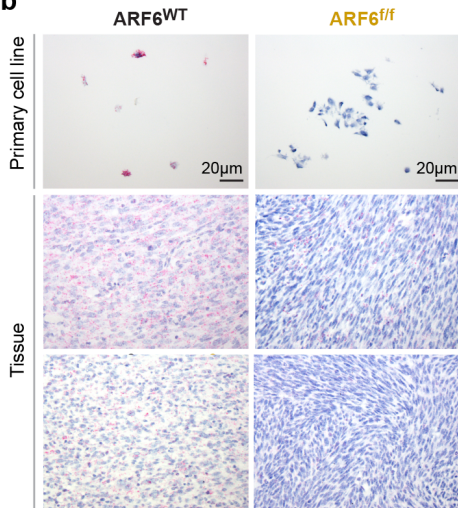**d**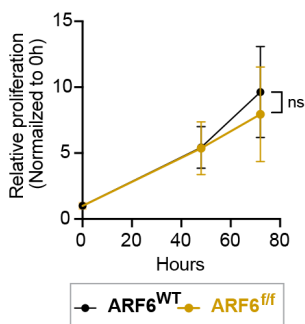**c**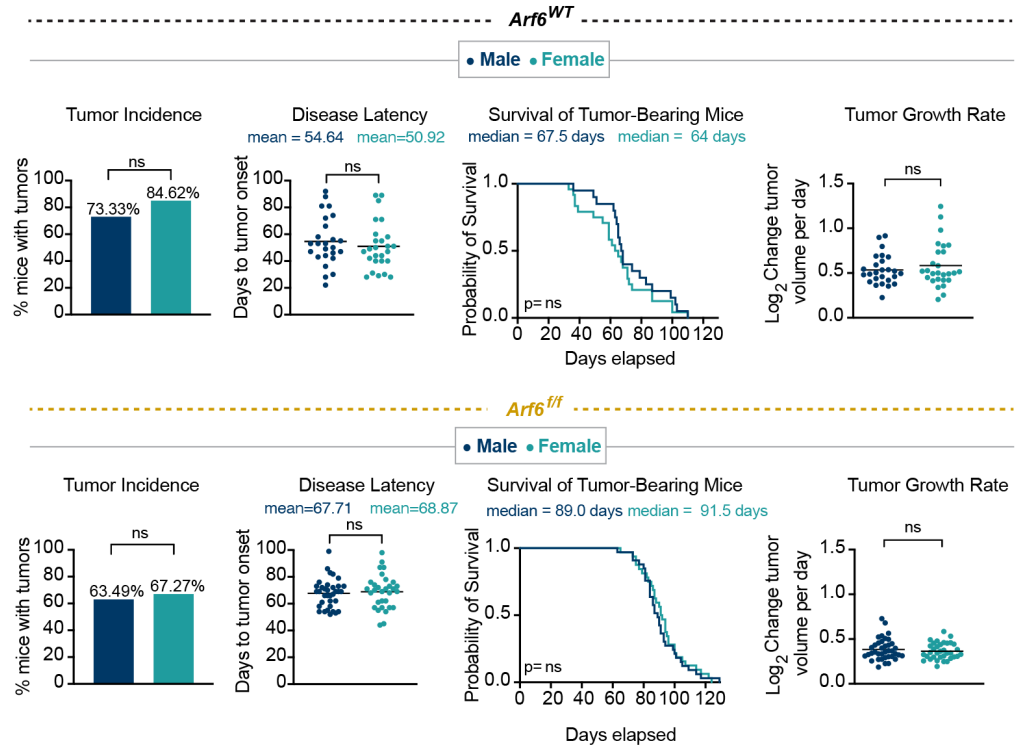**e**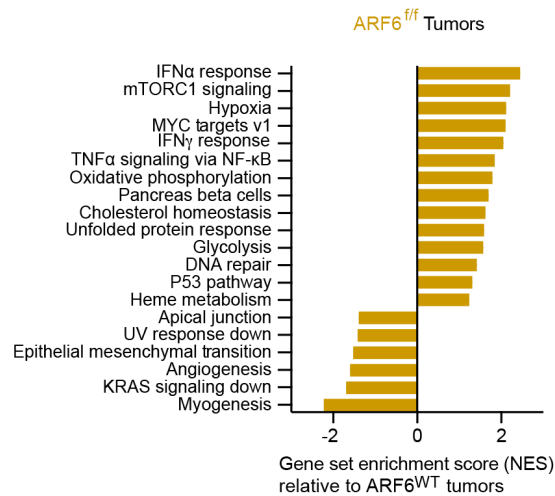**f**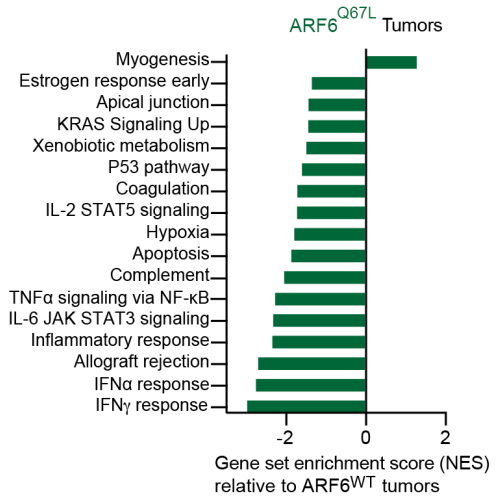

### Supplementary Figure 1: ARF6 expression and ARF6-dependent gene expression pathways in murine tumours, related to Figure 1 and 2.

**(a)** Western blot detection of indicated proteins in early-passage primary tumour cell lines. One independent experiment includes  $n=1$  tumour cell line derived from one *Arf6*<sup>WT</sup> mouse (see also Figure 4c, 4f, Supplementary Figure 5c for ARF6 expression from additional tumour cell lines derived from other *Arf6*<sup>WT</sup> mice),  $n=18$  tumour cell lines derived from eighteen *Arf6*<sup>fl/fl</sup> mice. **(b)** In situ hybridization detection of *Arf6* mRNA (pink). Left panels show expected diffuse signal. Right panels show expected loss of signal. Right middle panel shows representative low-level heterogeneous *Arf6* signal in murine tumour 19835, consistent with the low level of ARF6 detected by Western blot for the 19835 primary tumour cell line (see Supplementary Figure 1a). **(c)** Sex-based analysis of Figure 1d-g for *Arf6*<sup>WT</sup> and *Arf6*<sup>fl/fl</sup> mice. Tumour incidence (*Arf6*<sup>WT</sup>: Females  $n=45$ , Males  $n=39$ ; *Arf6*<sup>fl/fl</sup>: Females  $n=55$ , Males  $n=63$ ) two-sided Fisher's exact test; disease latency (*Arf6*<sup>WT</sup>: Females  $n=26$ , Males  $n=25$ ; *Arf6*<sup>fl/fl</sup>: Females  $n=31$ , Males  $n=35$ ) two-tailed t-test with Welch's correction; tumour growth rate (*Arf6*<sup>WT</sup>: Females  $n=27$ , Males  $n=26$ ; *Arf6*<sup>fl/fl</sup>: Females  $n=35$ , Males  $n=38$ ) two-tailed t-test with Welch's correction, and survival (*Arf6*<sup>WT</sup>: Females  $n=27$ , Males  $n=26$ ; *Arf6*<sup>fl/fl</sup>: Females  $n=35$ , Males  $n=38$ ) Log-rank (Mantle-Cox) test. **(d)** *In vitro* proliferation of murine melanoma, mean values shown for  $n=5$  different cell lines per genotype. **(e and f)** Bulk tumour transcriptomes (RNAseq) with significantly enriched gene sets (MSigDB Hallmark) in **(e)** ARF6<sup>fl/fl</sup> ( $n=6$ ) versus ARF6<sup>WT</sup> ( $n=6$ ) and **(f)** ARF6<sup>Q67L</sup> ( $n=6$ ) versus ARF6<sup>WT</sup> ( $n=4$ ) tumours. **(c)** Solid line within data points= mean. **(d)** Error bars= SD. Source data are provided as a Source Data file.

● ARF6<sup>WT</sup> ● ARF6<sup>ff</sup>

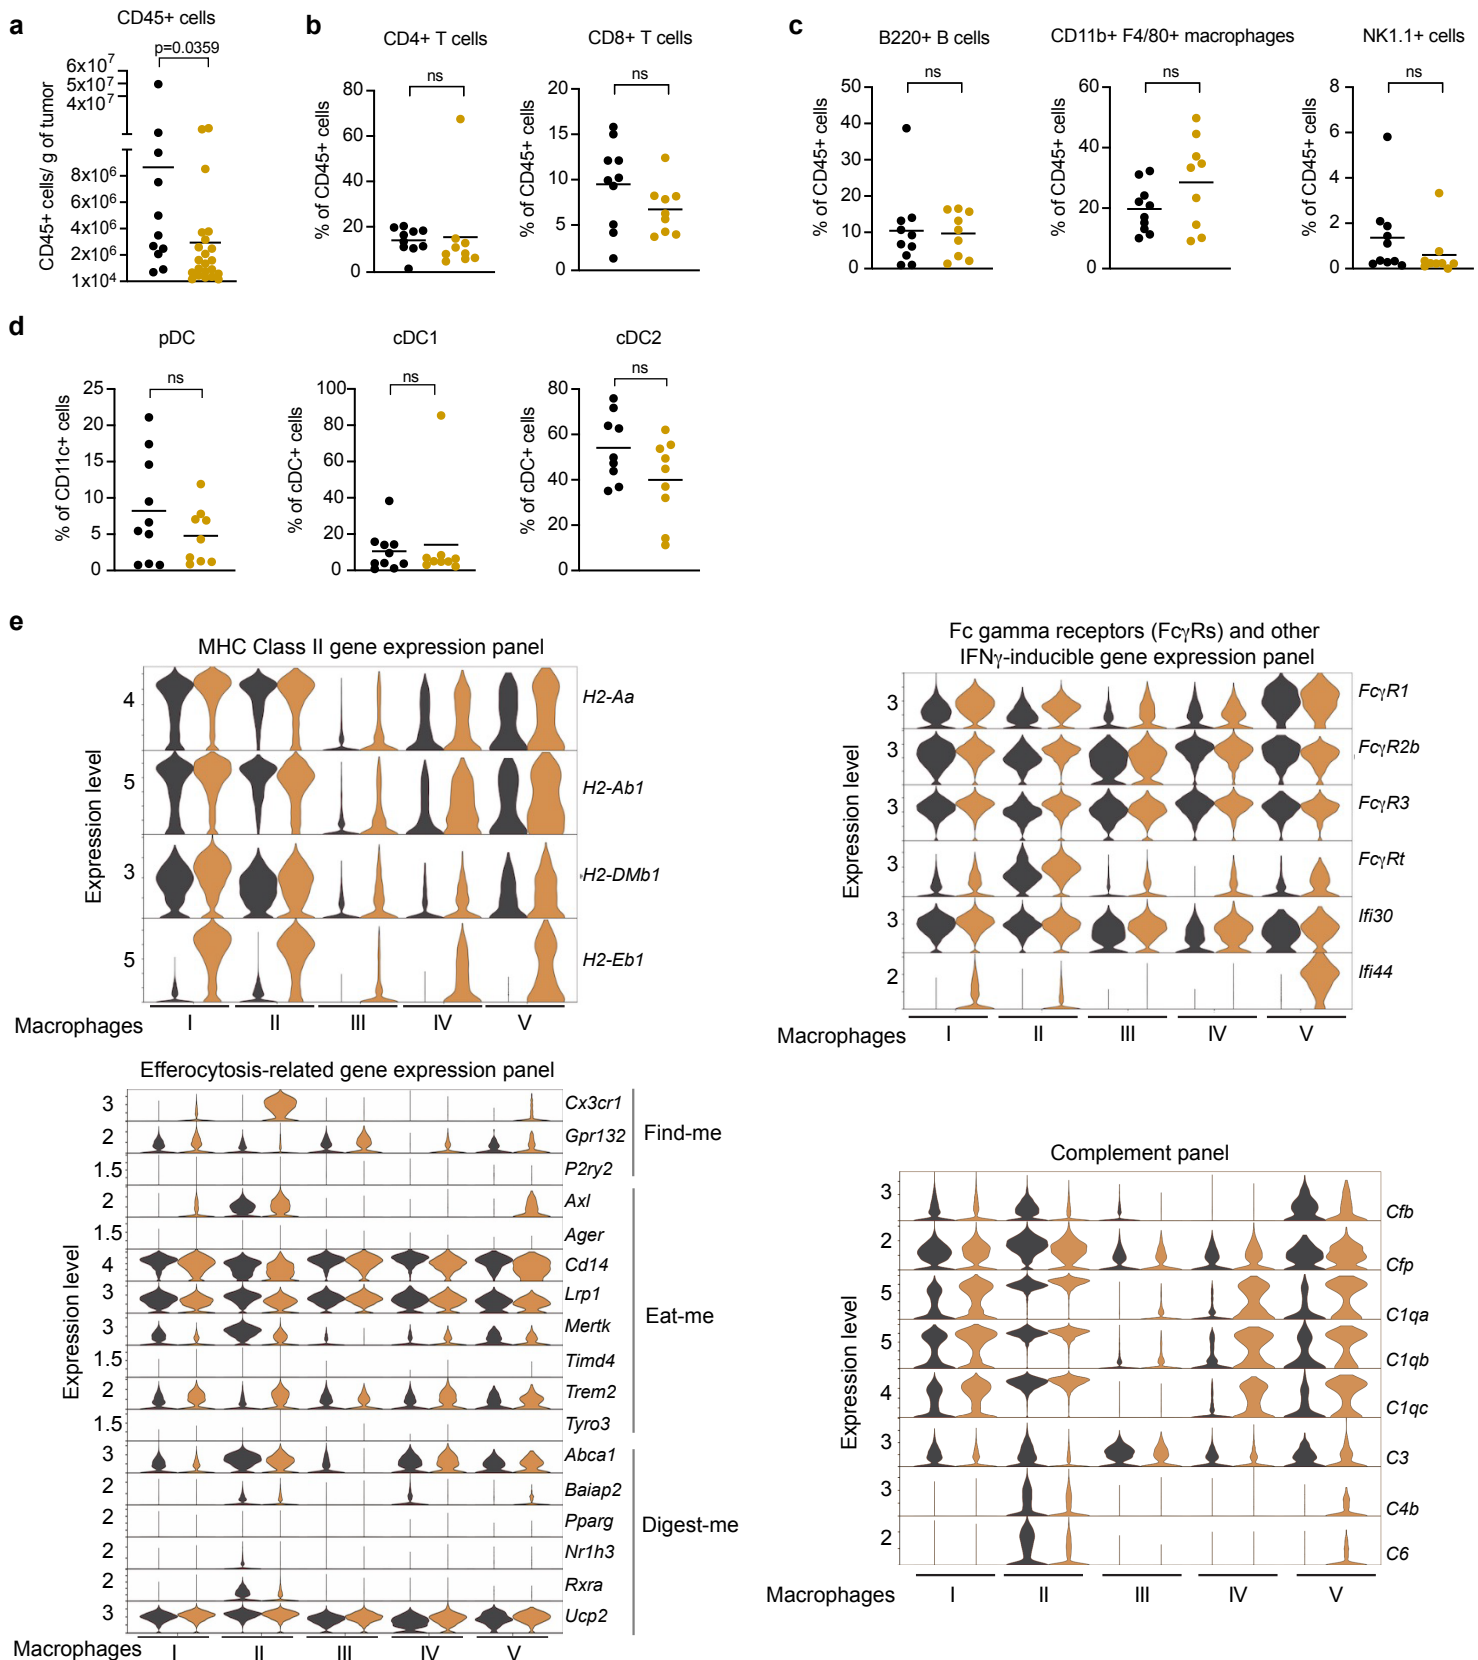

**Supplementary Figure 2: Immune profiling of tumour microenvironment, related to Figure 3.**

(a) The absolute numbers of CD45+ cells per gram of tumour. ARF6<sup>WT</sup>: n=11 tumours, ARF6<sup>ff</sup>: n=22 tumours (b) Fractions of CD4+ and CD8+ T cells in CD45+ cells. (c) Fractions of B220+ B cells, CD11b+F4/80+ macrophages, and NK1.1+ cells in CD45+ cells. (d) Fractions of plasmacytoid dendritic cells (pDC) and conventional dendritic cell subsets (cDC1 and cDC2). (b-d) ARF6<sup>WT</sup>: n=10 tumours, ARF6<sup>ff</sup>: n=9 tumours. (a-d) Solid line within data points= mean. Two-tailed Mann-Whitney t-test. (e) Expression of IFN $\gamma$ -inducible genes related to antigen presentation (MHC Class II), phagocytosis (Fc $\gamma$ R and other genes), efferocytosis-related genes and complement genes, across different subtypes of macrophages. Macrophages I: n= 2, 812 cells from ARF6<sup>WT</sup>, n= 3,695 cells from ARF6<sup>ff</sup> tumours; Macrophages II: n= 2, 069 cells from ARF6<sup>WT</sup>, n= 4, 152 cells from ARF6<sup>ff</sup> tumours; Macrophages III: n= 1, 525 cells from ARF6<sup>WT</sup>, n= 1, 422 cells from ARF6<sup>ff</sup> tumours; Macrophages IV: n= 899 cells from ARF6<sup>WT</sup>, n= 777 cells from ARF6<sup>ff</sup> tumours; Macrophages V: n= 225 cells from ARF6<sup>WT</sup>, n= 286 cells from ARF6<sup>ff</sup> tumours; from n=3 tumours of each genotype. A comprehensive list of adjusted p-values, obtained from Two-sided Seurat's Wilcoxon Rank Sum test for differentially expressed genes, is provided in Supplementary Table 2. Source data are provided as a Source Data file.

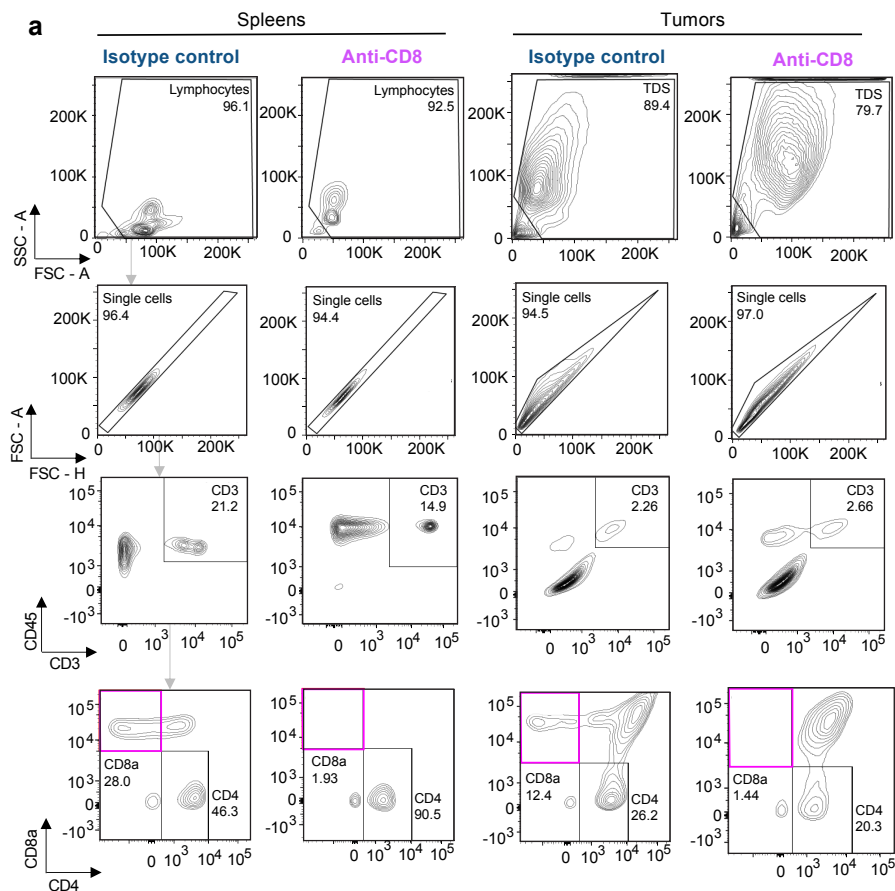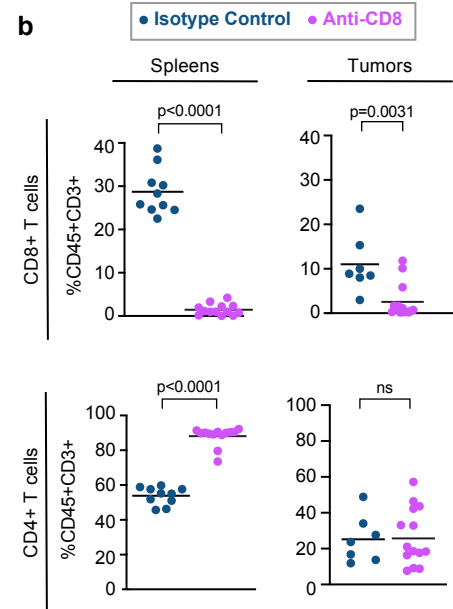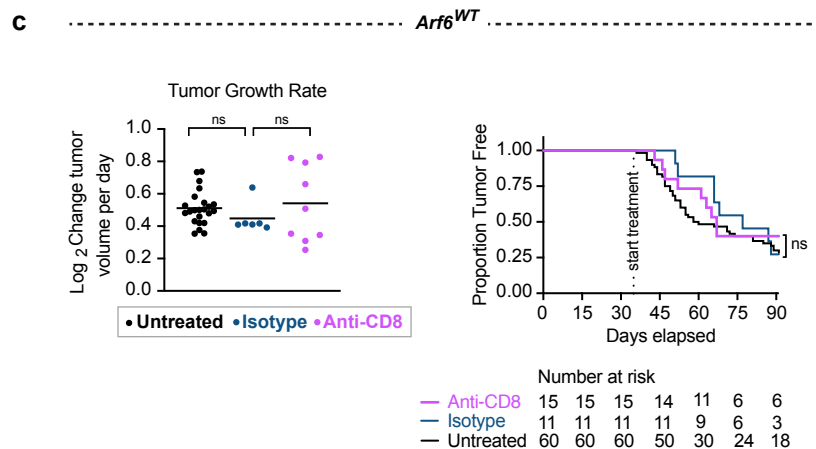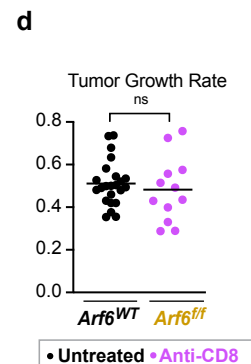

**Supplementary Figure 3: Efficiency of CD8 T cell depletion, related to Figure 3.**

(a and b) Quantitation of T cells by flow cytometry (a) and graph representing the mean (b) in spleens and tumours of *Arf6*<sup>fl/fl</sup> mice treated with isotype control (IgG2b) or anti-CD8 antibody. Two-tailed Mann-Whitney t-test. (c) Tumour-free survival (Kaplan-Meier log-rank test) and rate of tumour growth (untreated n=23, isotype n=6, anti-CD8 n=9), Two-tailed Welch's t-test, *Arf6*<sup>WT</sup> mice without or with CD8 T cell depletion. Antibody treatments were initiated when mice were 5-week-old and continued for 8 weeks. (d) Rate of tumour growth of untreated *Arf6*<sup>WT</sup> mice (n=23) compared to CD8 T cell depleted *Arf6*<sup>fl/fl</sup> mice (n=12), Two-tailed Welch's t-test. (b, c, d) Solid line within data points= mean. Source data are provided as a Source Data file.



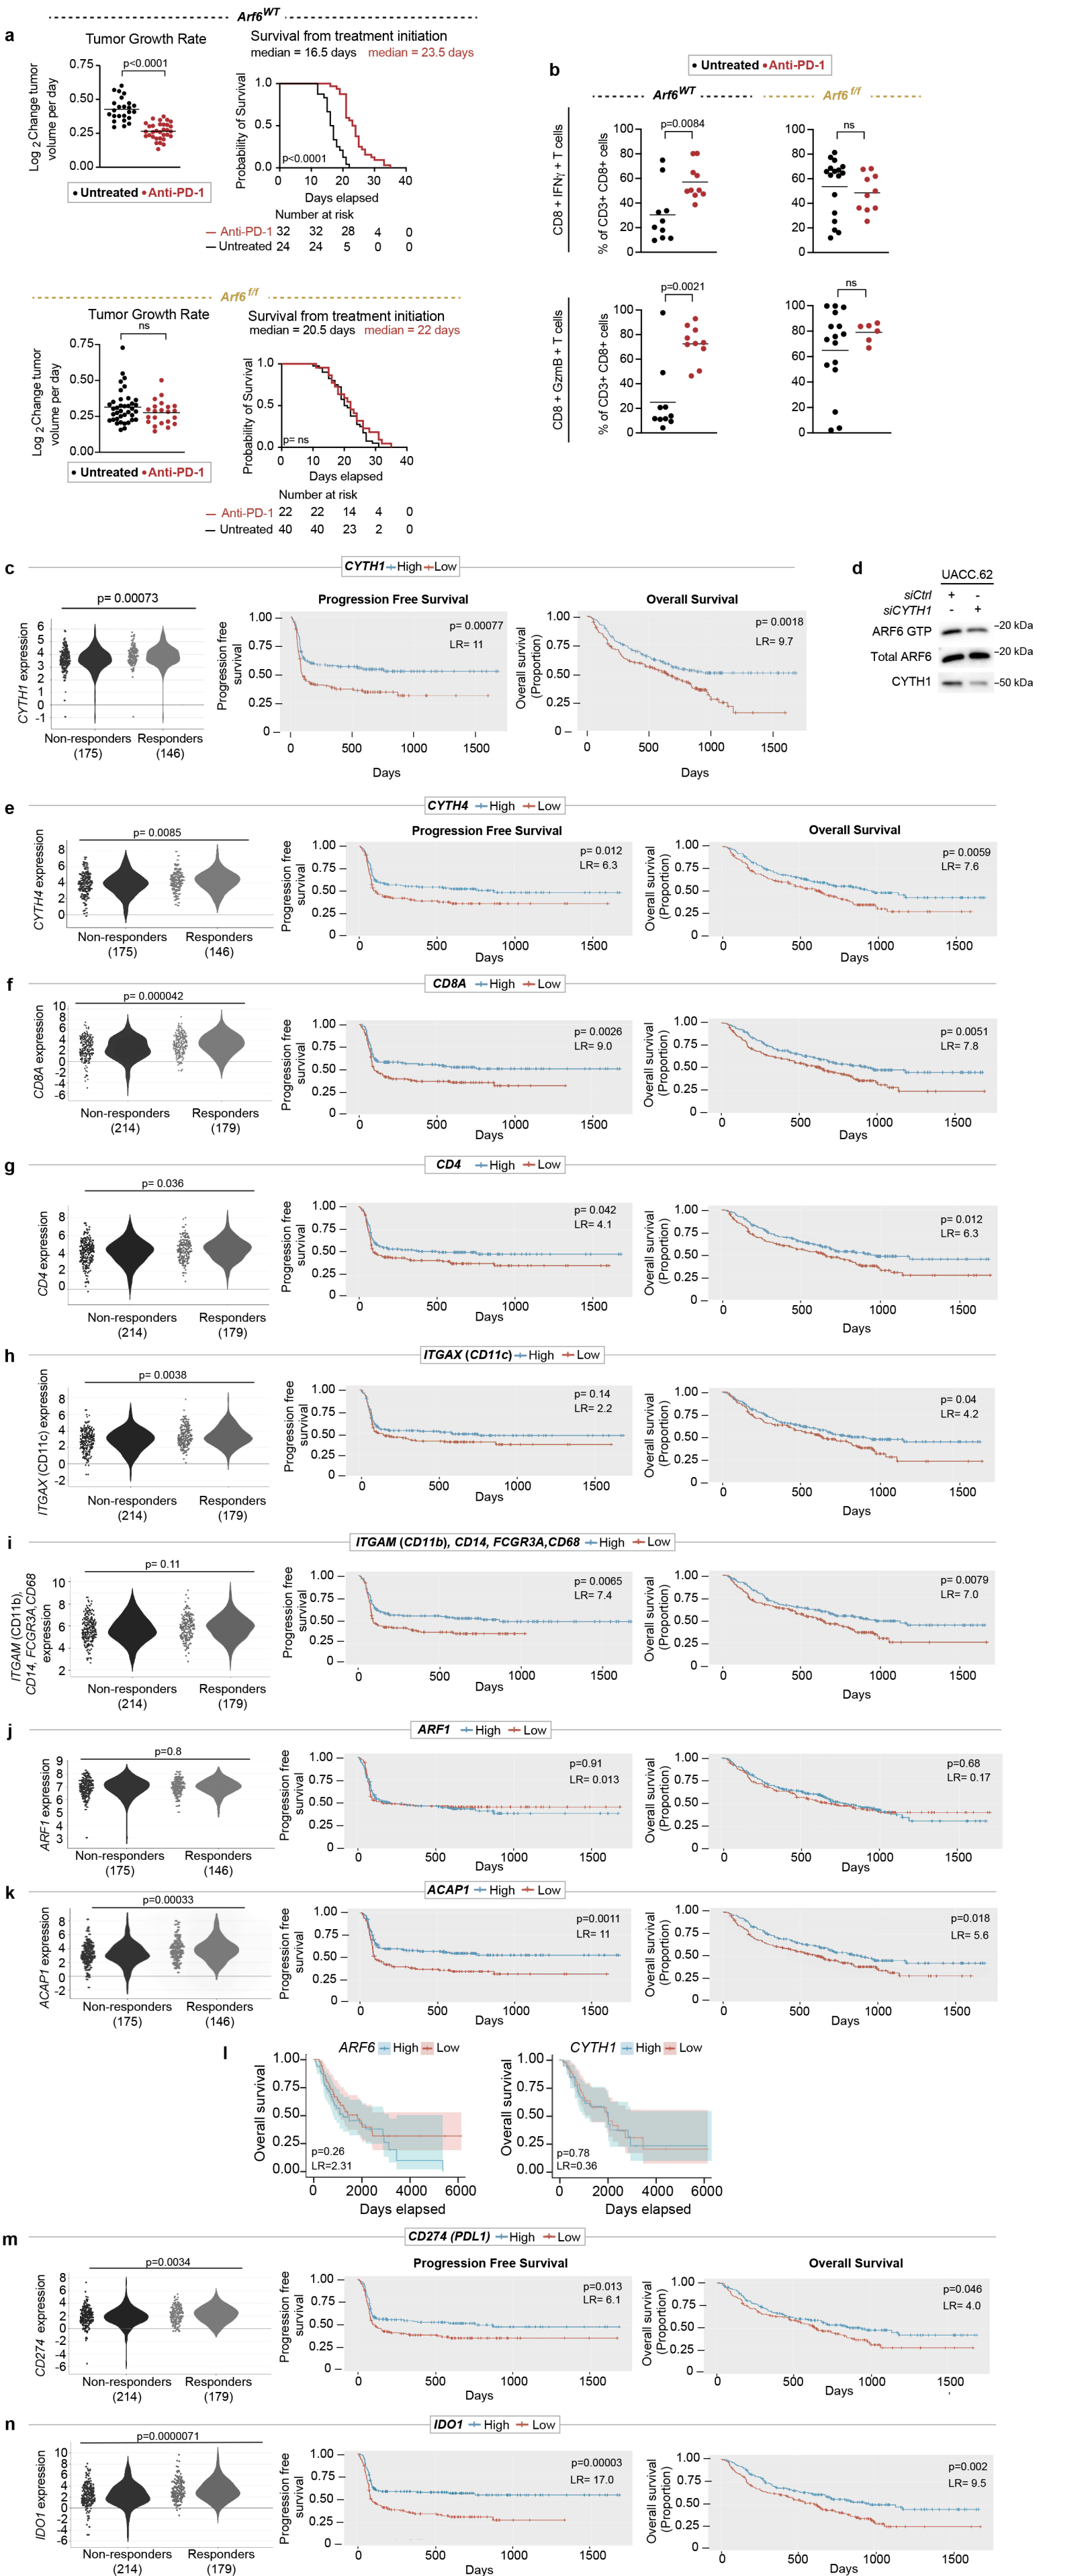

**Supplementary Figure 4: ICB treatment outcomes, related to Figure 4.**

(a) Systemic anti-PD-1 treatment initiated in *Arf6*<sup>WT</sup> and *Arf6*<sup>fl/fl</sup> mice with established tumours (up to 5mm in greatest dimension, 27-72mm<sup>3</sup>). *Arf6*<sup>WT</sup> (untreated controls n=24, anti-PD-1 n=32) and *Arf6*<sup>fl/fl</sup> (untreated controls n=38, anti-PD-1 n=22). Rate of tumour growth measured from initiation of treatment. Two-tailed Welch's t-test. Survival (primary tumour reached 2cm) from initiation of treatment, Log-rank (Mantle-Cox) test. (b) T cell effector function, anti-PD-1 treated mice, measured by flow cytometric detection of IFN $\gamma$  and granzyme B (GzmB) in tumour-infiltrating CD8+ T cells. Quantification of IFN $\gamma$  (*Arf6*<sup>WT</sup>: untreated n=10, Anti-PD-1 treated n=10; *Arf6*<sup>fl/fl</sup>: untreated n=17, Anti-PD-1 treated n=9); granzyme B (GzmB) (*Arf6*<sup>WT</sup>: untreated n=10, Anti-PD-1 treated n=9; *Arf6*<sup>fl/fl</sup>: untreated n=16, Anti-PD-1 treated n=6). (c) Association of ICB treatment outcome in melanoma patients with mRNA levels of *CYTH1*. (d) Total ARF6 and ARF6 GTP pull-down in UACC.62 human melanoma cells with or without knockdown of *CYTH1*. n=1 biologically independent experiment. (e-l) Association of ICB treatment outcome in melanoma patients with mRNA levels of *CYTH4* (e) *CD8A* (T cells) (f) *CD4* (T cells) (g) *ITGAX (CD11c)* (dendritic cells) (h) *ITGAM (CD11b)*, *CD14*, *FCGR3A*, *CD68* (macrophages) (i), *ARF1* (j) and *ACAP1* (k) in transcriptomes of pretreatment melanoma biopsies (Cancer-Immune expression analysis). (l) Lack of association of *ARF6* and *CYTH1* expression (tumour) with survival of non-ICB treated melanoma patients with stage III and stage IV (TCGA, Q1 n=41 vs. Q4 n=41). p value = log-rank test comparison. LR = likelihood ratio. (m-n) Association of ICB treatment outcome in melanoma patients with mRNA levels of *CD274* (m), *IDO1* (n) in transcriptomes of pretreatment melanoma biopsies, Cancer-Immune expression analysis, queried melanoma clinical outcomes, adjusted p-values, Benjamini and Hochberg procedure, LR = likelihood ratio (df=1) aggregated data from n=13. (c,e,j,k) PFS n=155, OS n=160 in each high and low cohort. (f,g,h,i,m,n) PFS n=155, OS n=160 in each high and low cohort (a-b) Solid line within data points = mean. (a-b,d) Source data are provided as a Source Data file.



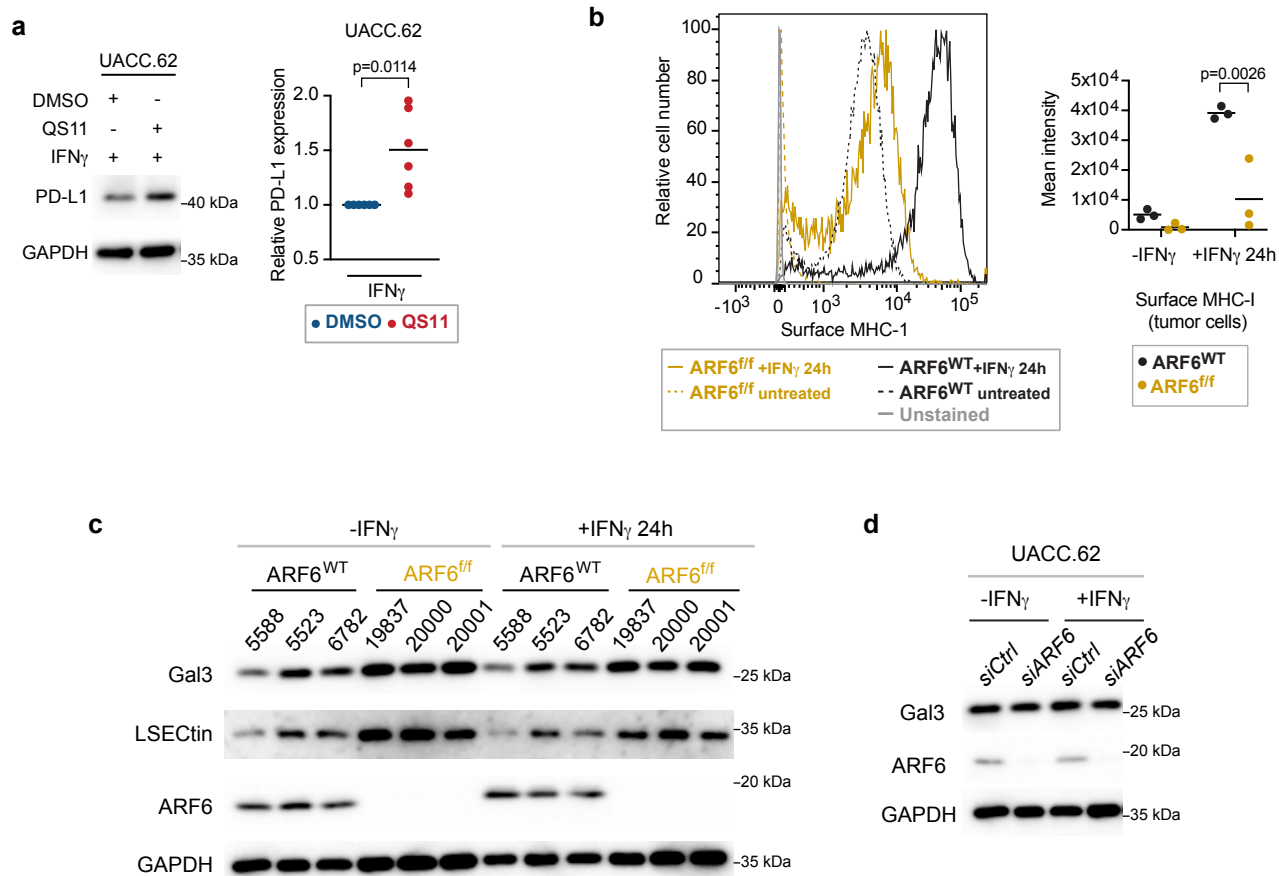

**Supplementary Figure 5: Expression of PD-L1, MHC-1 and LAG3 ligands, related to Figure 5.**

**(a)** Western blot detection of PD-L1. 2 $\mu$ M QS11 for 4h. 500U/ml IFN $\gamma$ . n=6 biologically independent experiments. Two-tailed Ratio paired t-test **(b)** Flow cytometric detection of tumour cell surface MHC-I expression, n=3 biologically independent cell lines of each genotype. Two-way ANOVA test. **(c)** Western blot detection of Galectin3 (Gal3) and LSEctin in murine melanoma, n=3 biologically independent cell lines of each genotype. **(d)** Western blot detection of Gal3 in UACC.62 cells with or without ARF6 knockdown, n=3 biologically independent experiments. **(a,b)** Solid line within data points= mean. Source data are provided as a Source Data file.

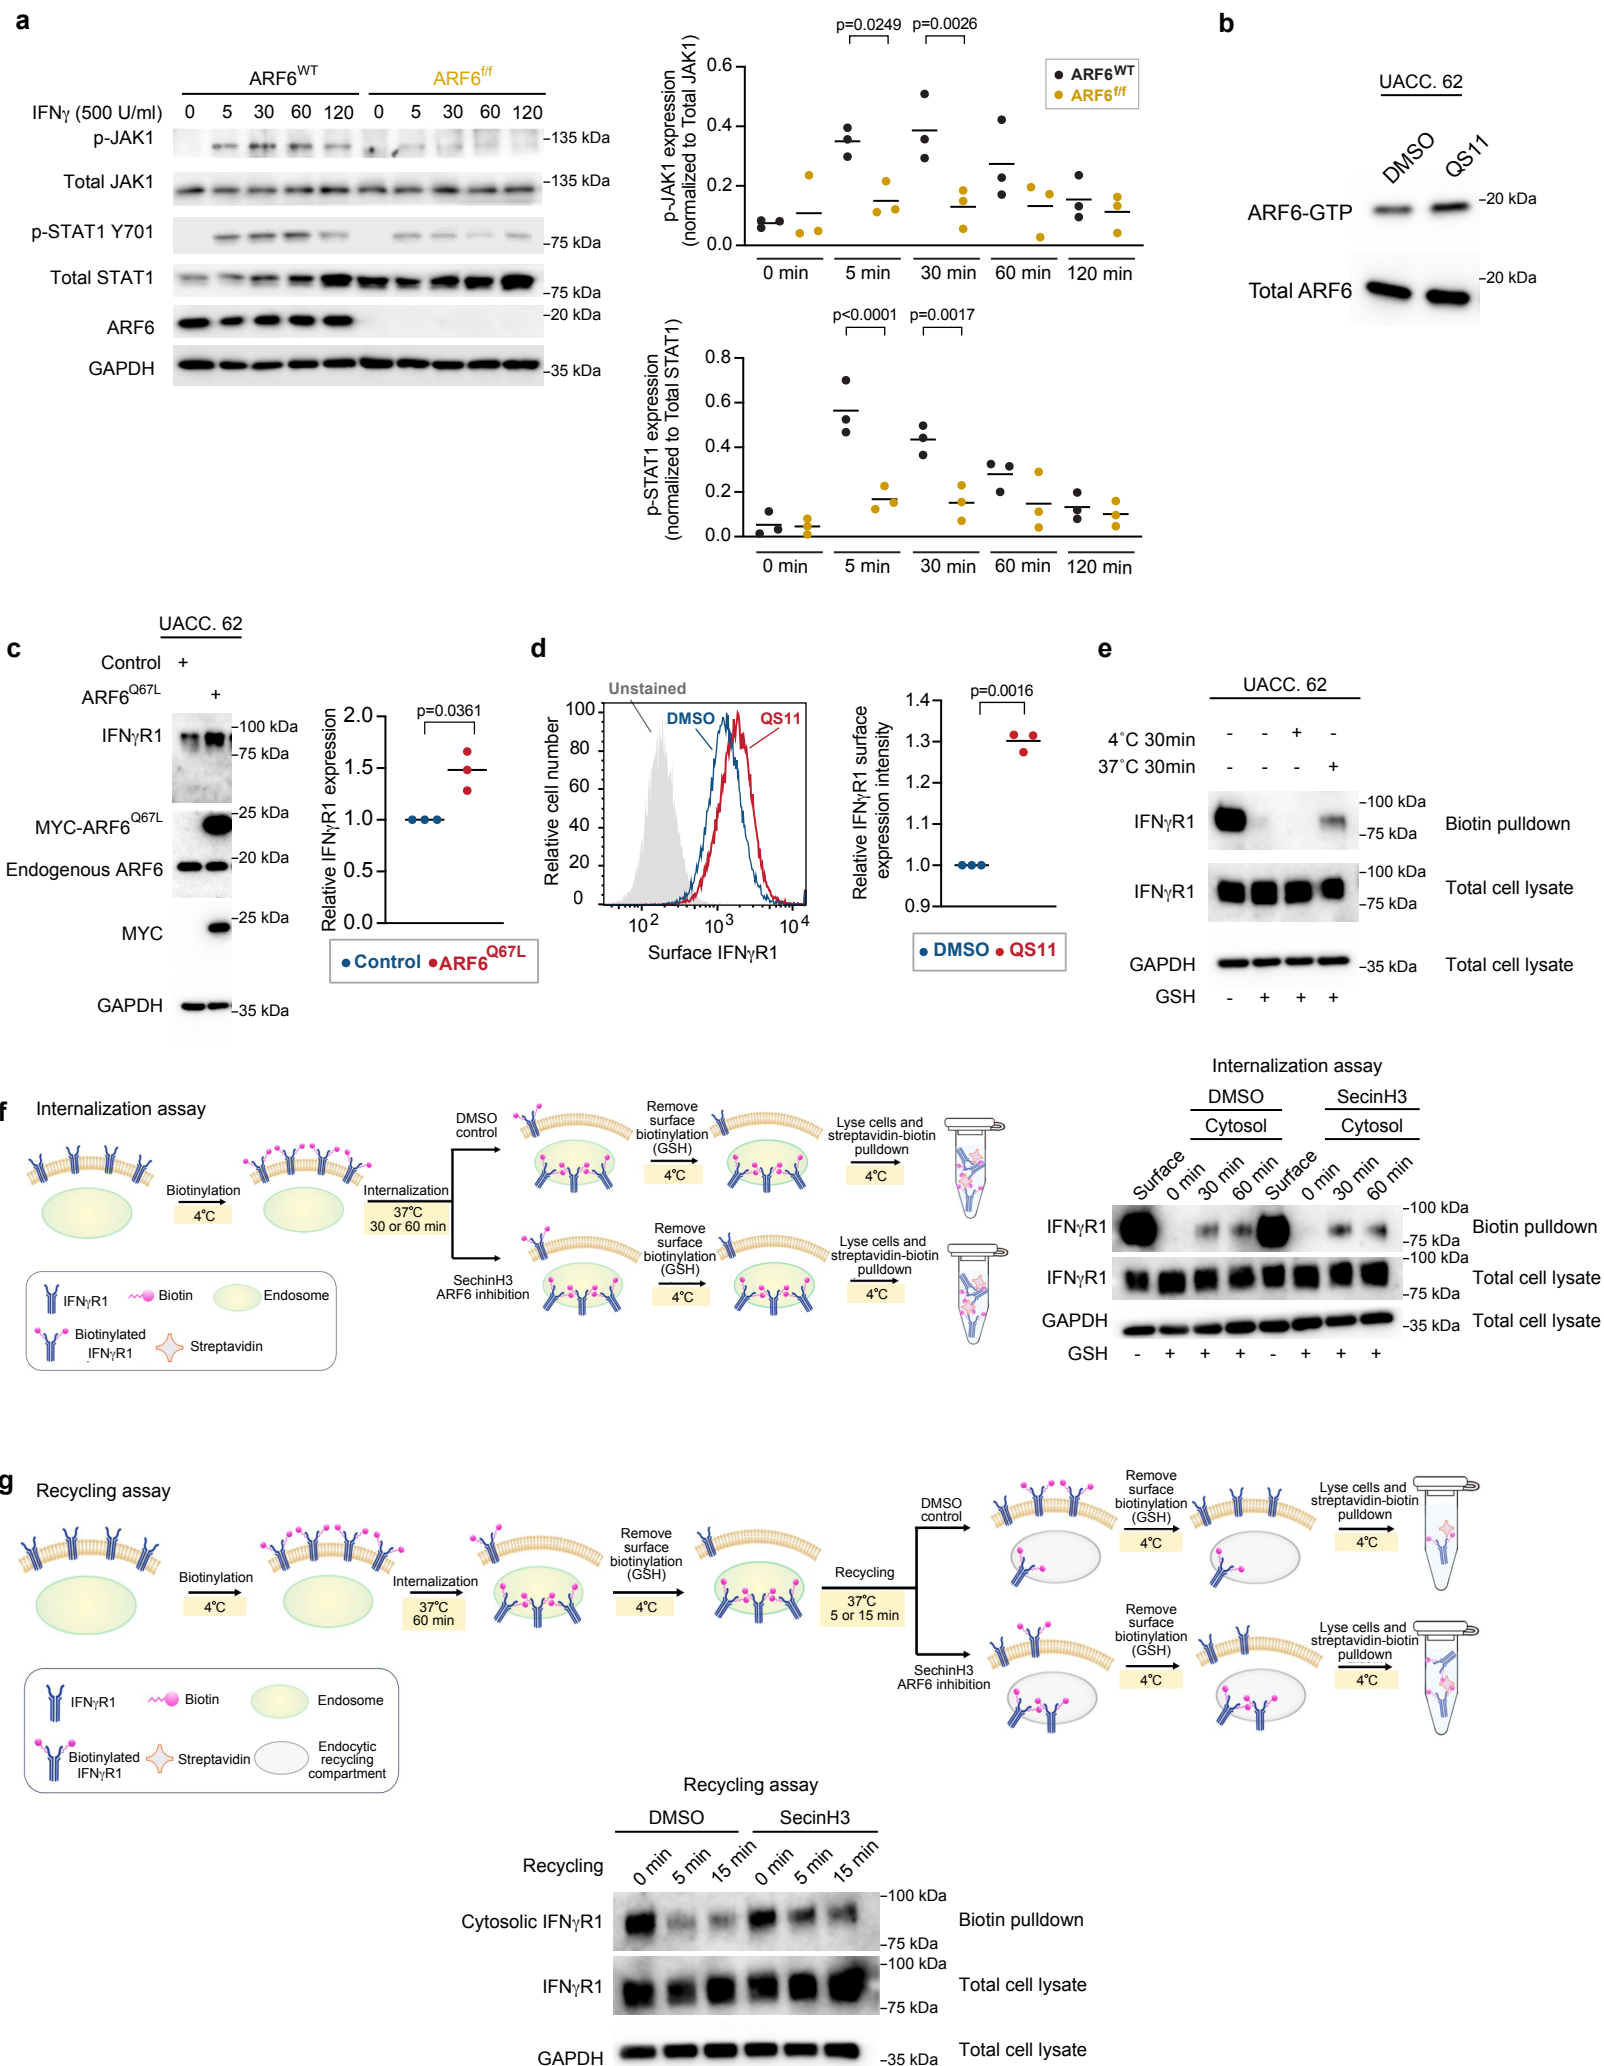

**Supplementary Figure 6: Tumour-intrinsic ARF6-dependent IFN $\gamma$  signaling, related to Figure 6.**

(a) IFN $\gamma$ -induced JAK-STAT signaling detection in early-passage murine melanoma cell lines. n=3 biologically independent cell lines of each genotype. Two-way ANOVA with Tukey's multiple comparisons test. (b) Total ARF6 and ARF6 GTP pull-down in UACC.62 cells without or with 2mM QS11 treatment for 1hr. n=1 biologically independent experiment. (c) Western blot for indicated proteins in UACC.62 cells with or without adenoviral-mediated ectopic expression of constitutively active ARF6 (ARF6<sup>Q67L</sup>), control= empty vector, n=3 biologically independent experiments. Two-tailed Ratio paired t-test. (d) Flow cytometric detection of surface IFN $\gamma$ R1 expression. 2 $\mu$ M QS11 treated for 6h prior to flow cytometry, n=3 biologically independent experiments. Two-tailed Ratio paired t-test. (e) Ligand-independent endocytosis of IFN $\gamma$ R1 induced at 37°C, followed by Biotin pull-down. GSH= glutathione stripping buffer. n=1 biologically independent experiment. (f) Internalization assay of IFN $\gamma$ R1, top panel: Schematic representation of internalization assay of IFN $\gamma$ R1 in human melanoma (UACC.62) treated with DMSO (control) or ARF6 inhibitor SecinH3 (30 $\mu$ M). bottom panel: Western Blot of internalized IFN $\gamma$ R1. n=1 biologically independent experiment. (g) Recycling assay of IFN $\gamma$ R1, top panel: Schematic representation of recycling assay of IFN $\gamma$ R1 in human melanoma (UACC.62) treated with DMSO (control) or ARF6 inhibitor SecinH3 (30 $\mu$ M). bottom panel: Western Blot of remaining cytosolic IFN $\gamma$ R1. n=1 biologically independent experiment. (c-d) Solid line within data points= mean. Source data are provided as a Source Data file.

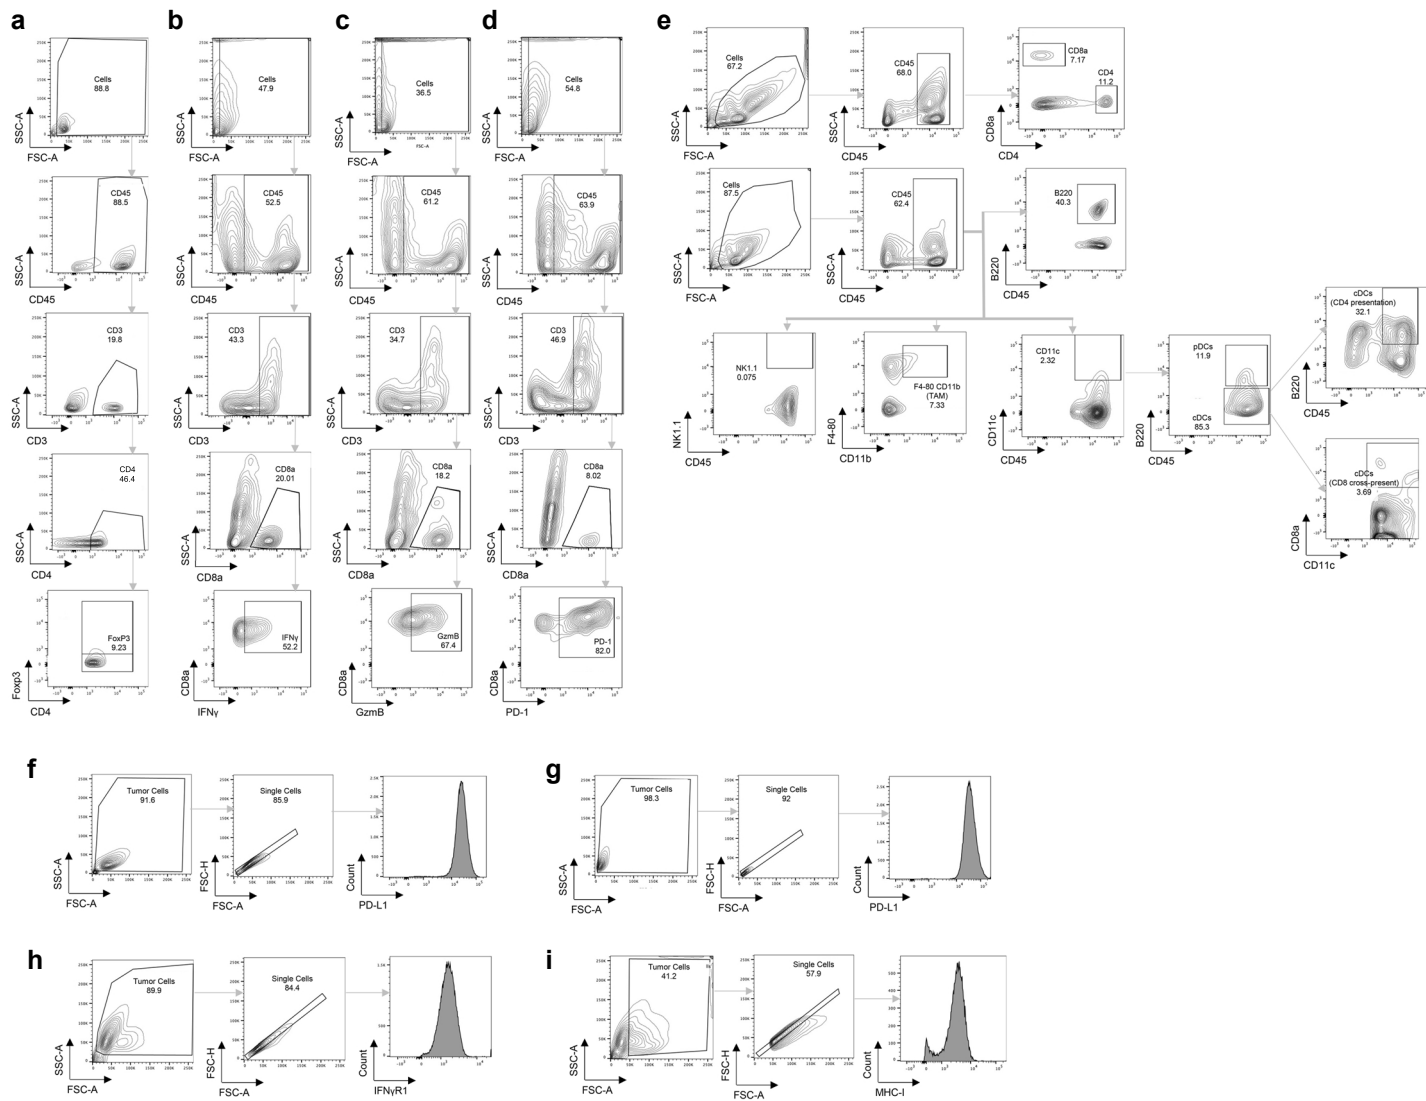

### Supplementary Figure 7: Gating Strategies for Flow Cytometry

(a) Tregs (for Figure 3c) (b) CD8+ IFN $\gamma$ + Cells (for Figure 3a) (c) CD8+ GzmB+ Cells (for Figure 3a) (d) CD8+PD-1+ Cells (for Figure 3a) (e) Cell populations in Supplementary Figure 2a-d. (f) Surface PD-L1 (for Figure 5b). (g) Total PD-L1 (for Figure 5b). (h) Surface IFN $\gamma$ R1 (for Figure 6a). (i) Surface MHC-1 (for Supplementary Figure 5b).



| Supplementary Table 1. ARF6 pathway genes. |                                                                                                                                                                                            |
|--------------------------------------------|--------------------------------------------------------------------------------------------------------------------------------------------------------------------------------------------|
| ARFs                                       | <i>ARF1, ARF3, ARF4, ARF5, ARF6</i>                                                                                                                                                        |
| GEFs                                       | <i>CYTH1, CYTH2, CYTH3, CYTH4, IQSEC1/GEP100, IQSEC2, IQSEC3, GBF1, ARFGEF1, ARFGEF2, PSD/EFA6</i>                                                                                         |
| GAPs                                       | <i>ACAP1, ACAP2, ACAP3, ARAP1, ARAP2, ARAP3, ARFGAP1, ARFGAP2, ARFGAP3, ASAP1, ASAP2, ASAP3, GIT1, GIT2, SMAP1, SMAP2, ADAP1, ADAP2, AGAP1, AGAP2, AGAP3, AGAP4, AGFG1, AGFG2, PDCD6IP</i> |

Supplementary Table 2. Adjusted p-values using Two-sided Seurat's Wilcoxon Rank Sum test for Supplementary Figure 2e.

| Gene Function                                            | Gene           | Adjusted p-values |                |                |               |              |
|----------------------------------------------------------|----------------|-------------------|----------------|----------------|---------------|--------------|
|                                                          |                | Macrophage I      | Macrophage II  | Macrophage III | Macrophage IV | Macrophage V |
| MHC Class II gene expression panel                       | <i>H2-Aa</i>   | 1.95E-75          | 1.00E+00       | 8.69E-21       | 0.504831556   | 1.00E+00     |
|                                                          | <i>H2-Ab1</i>  | 5.20E-35          | 1.10E-22       | 1.07E-23       | 2.29E-15      | 1.00E+00     |
|                                                          | <i>H2-DMb1</i> | 6.71E-72          | 0.007224454    | 2.17E-27       | 1.78E-09      | 1.00E+00     |
|                                                          | <i>H2-Eb1</i>  | <2.225074e-308    | <2.225074e-308 | 8.83E-139      | 4.31E-106     | 2.08E-32     |
| Fc gamma receptors (FcγRs) and other IFNγ-inducible gene | <i>FcγR1</i>   | 2.91E-156         | 2.25E-159      | 7.50E-31       | 1.00E+00      | 1.00E+00     |
|                                                          | <i>FcγR2b</i>  | 7.83E-26          | 4.23E-163      | 1.00E+00       | 1.00E+00      | 1.00E+00     |
|                                                          | <i>FcγR3</i>   | 1.09E-39          | 1.94E-169      | 1.00E+00       | 1.00E+00      | 1.00E+00     |
|                                                          | <i>FcγRt</i>   | 3.10E-31          | 3.11E-76       | 1.20E-11       | 5.00E-18      | 1.48E-05     |
|                                                          | <i>Ifi30</i>   | 5.48E-24          | 1.00E+00       | 3.13E-23       | 2.04E-11      | 0.581995712  |
|                                                          | <i>Ifi44</i>   | <2.225074e-308    | 4.88E-161      |                |               | 1.39E-61     |
| Complement                                               | <i>Cfb</i>     | 3.50E-13          | 2.92E-137      | 5.43E-13       |               | 1.00E+00     |
|                                                          | <i>Cfp</i>     | 1.00E+00          | 6.40E-91       | 1.00E+00       | 1.00E+00      | 1.00E+00     |
|                                                          | <i>C1qa</i>    | 1.32E-74          | 1.91E-142      | 1.17E-07       | 8.11E-64      | 2.42E-13     |
|                                                          | <i>C1qb</i>    | 1.50E-42          | 2.70E-08       | 0.400581784    | 1.92E-43      | 3.35E-09     |
|                                                          | <i>C1qc</i>    | 6.96E-53          | 3.94E-12       |                | 1.52E-53      | 8.79E-13     |
|                                                          | <i>C3</i>      | 6.51E-53          | 1.74E-143      | 5.44E-11       | 0.017446926   | 1.00E+00     |
|                                                          | <i>C4b</i>     |                   | 1.39E-18       |                |               | 0.000667637  |
|                                                          | <i>C6</i>      |                   | 3.22E-67       |                |               | 3.17E-09     |
| Efferocytosis- Find-me                                   | <i>Cx3cr1</i>  | 1.39E-145         | <2.225074e-308 |                |               | 1.84E-09     |
|                                                          | <i>Gpr132</i>  | 0.89241392        | 1.98E-22       | 6.51E-10       | 1.00E+00      | 1.00E+00     |
|                                                          | <i>P2ry2</i>   |                   |                |                |               |              |
| Efferocytosis-Eat-me                                     | <i>Axl</i>     | 2.87E-86          | 0.000256594    |                |               | 3.20E-11     |
|                                                          | <i>Ager</i>    |                   |                |                |               |              |
|                                                          | <i>Cd14</i>    | 1.75E-51          | 2.69E-69       | 4.28E-06       | 2.30E-46      | 2.51E-11     |
|                                                          | <i>Lrp1</i>    | 2.08E-42          | 7.13E-207      | 1.00E+00       | 1.00E+00      | 1.00E+00     |
|                                                          | <i>Mertk</i>   | 1.22E-117         | <2.225074e-308 | 2.83E-08       | 1.00E+00      | 1.00E+00     |
|                                                          | <i>Timd4</i>   |                   |                |                |               |              |
|                                                          | <i>Trem2</i>   | 3.30E-55          | 1.38E-153      | 1.00E+00       | 1.45E-07      | 1.00E+00     |
|                                                          | <i>Tyro3</i>   |                   |                |                |               |              |
| Efferocytosis-Digest-me                                  | <i>Abca1</i>   | 1.18E-47          | 4.57E-29       | 9.16E-35       | 1.00E+00      | 1.00E+00     |
|                                                          | <i>Balap2</i>  |                   | 1.00E+00       |                | 1.00E+00      | 1.00E+00     |
|                                                          | <i>Pparg</i>   |                   |                |                |               |              |
|                                                          | <i>Nr1h3</i>   |                   | 1.00E+00       |                |               |              |
|                                                          | <i>Rxra</i>    |                   | 1.95E-75       |                |               |              |
|                                                          | <i>Ucp2</i>    | 2.22E-30          | 1.00E+00       | 1.94E-28       | 4.42E-22      | 1.00E+00     |

| Color | Description                                                                                                                       |
|-------|-----------------------------------------------------------------------------------------------------------------------------------|
|       | low gene expression                                                                                                               |
|       | gene expression of macrophages in ARF6 <sup>ff</sup> is greater than ARF6 <sup>WT</sup> tumors, and the difference is significant |
|       | gene expression of macrophages in ARF6 <sup>WT</sup> is greater than ARF6 <sup>ff</sup> tumors, and the difference is significant |
|       | gene expression of macrophages in ARF6 <sup>ff</sup> tumors is trending higher, but not significant                               |
|       | gene expression of macrophages in ARF6 <sup>WT</sup> tumors is trending higher, but not significant                               |

Supplementary Table 3. Cancer-Immu analysis of ARF6 pathway genes.

| Gene                 | Immunotherapy Response | Progression Free Survival |         | Overall Survival |         |
|----------------------|------------------------|---------------------------|---------|------------------|---------|
|                      | p-value                | Likelihood ratio          | p-value | Likelihood ratio | p-value |
| <b>ARFs</b>          |                        |                           |         |                  |         |
| <i>ARF1</i>          | 0.8                    | 0.013                     | 0.91    | 0.17             | 0.68    |
| <i>ARF3</i>          | 0.19                   | 0.078                     | 0.78    | 0.0013           | 0.97    |
| <i>ARF4</i>          | 0.2                    | 4.6                       | 0.032   | 1.2              | 0.27    |
| <i>ARF5</i>          | 0.76                   | 0.0000022                 | 1       | 1.8              | 0.18    |
| <i>ARF6</i>          | 0.006                  | 3.5                       | 0.061   | 7.1              | 0.0078  |
| <b>GEFs</b>          |                        |                           |         |                  |         |
| <i>CYTH1</i>         | 0.00073                | 11                        | 0.00077 | 9.7              | 0.0018  |
| <i>CYTH2</i>         | 0.32                   | 0.025                     | 0.88    | 1.5              | 0.21    |
| <i>CYTH3</i>         | 0.4                    | 0.0019                    | 0.96    | 0.39             | 0.53    |
| <i>CYTH4</i>         | 0.0085                 | 6.3                       | 0.012   | 7.6              | 0.0059  |
| <i>IQSEC1/GEP100</i> | 0.49                   | 1.3                       | 0.26    | 8.6              | 0.0033  |
| <i>IQSEC2</i>        | 0.87                   | 0.24                      | 0.62    | 2.6              | 0.11    |
| <i>IQSEC3</i>        | 0.71                   | 1.1                       | 0.29    | 5.1              | 0.023   |
| <i>GBF1</i>          | 0.23                   | 1.6                       | 0.21    | 2.2              | 0.14    |
| <i>ARFGEF1</i>       | 0.44                   | 0.45                      | 0.5     | 4.3              | 0.038   |
| <i>ARFGEF2</i>       | 0.67                   | 0.084                     | 0.77    | 0.087            | 0.77    |
| <i>PSD/EFA6</i>      | 0.0051                 | 6.5                       | 0.011   | 4.4              | 0.035   |
| <b>GAPs</b>          |                        |                           |         |                  |         |
| <i>ACAP1</i>         | 0.00033                | 11                        | 0.0011  | 5.6              | 0.018   |
| <i>ACAP2</i>         | 0.63                   | 1.2                       | 0.27    | 0.25             | 0.61    |
| <i>ACAP3</i>         | 0.62                   | 0.77                      | 0.38    | 2.5              | 0.11    |
| <i>ARAP1</i>         | 0.51                   | 1.1                       | 0.3     | 6.4              | 0.011   |
| <i>ARAP2</i>         | 0.0071                 | 3                         | 0.084   | 1.9              | 0.16    |
| <i>ARAP3</i>         | 0.59                   | 0.74                      | 0.39    | 9.2              | 0.0025  |
| <i>ARFGAP1</i>       | 0.32                   | 0.99                      | 0.32    | 0.79             | 0.37    |
| <i>ARFGAP2</i>       | 0.13                   | 1                         | 0.32    | 3.8              | 0.052   |
| <i>ARFGAP3</i>       | 0.6                    | 0.028                     | 0.87    | 0.048            | 0.83    |
| <i>ASAP1</i>         | 0.14                   | 0.88                      | 0.35    | 0.73             | 0.39    |
| <i>ASAP2</i>         | 0.51                   | 0.16                      | 0.69    | 1.4              | 0.23    |
| <i>ASAP3</i>         | 0.41                   | 0.37                      | 0.54    | 1.5              | 0.22    |
| <i>GIT1</i>          | 0.78                   | 0.013                     | 0.91    | 0.39             | 0.53    |
| <i>GIT2</i>          | 0.24                   | 0.098                     | 0.75    | 0.63             | 0.43    |
| <i>SMAP1</i>         | 0.14                   | 0.28                      | 0.6     | 5.8              | 0.016   |
| <i>SMAP2</i>         | 0.021                  | 3                         | 0.081   | 4                | 0.045   |
| <i>ADAP1</i>         | 0.38                   | 0.062                     | 0.8     | 0.51             | 0.48    |
| <i>ADAP2</i>         | 0.18                   | 1.2                       | 0.27    | 0.091            | 0.76    |
| <i>AGAP1</i>         | 0.2                    | 0.56                      | 0.45    | 0.24             | 0.62    |
| <i>AGAP2</i>         | 0.23                   | 2                         | 0.16    | 1.3              | 0.26    |
| <i>AGAP3</i>         | 0.92                   | 1.1                       | 0.29    | 0.038            | 0.85    |
| <i>AGAP4</i>         | 0.88                   | 0.89                      | 0.35    | 0.85             | 0.36    |
| <i>AGFG1</i>         | 0.82                   | 0.011                     | 0.92    | 0.25             | 0.61    |
| <i>AGFG2</i>         | 0.49                   | 0.16                      | 0.69    | 0.12             | 0.73    |
| <i>PDCD6IP</i>       | 0.82                   | 0.034                     | 0.85    | 0.00097          | 0.98    |

Cancer-Immu expression analysis, aggregated data from n=13 queried melanoma clinical studies, adjusted p-values, Benjamini and Hochberg procedure, LR=likelihood ratio with df=1. Related to Figure 4 and Supplementary Figure 4.



Supplementary Table 4. Key resource table

**Antibodies**

| Target Antigen                                            | Fluorophore | Clone       | Vendor                    | Catalog#   | Working Dilution |
|-----------------------------------------------------------|-------------|-------------|---------------------------|------------|------------------|
| <b>Antibodies (Flow Cytometry-Cell surface staining)</b>  |             |             |                           |            |                  |
| B220                                                      | FITC        | RA3-6B2     | BioLegend                 | 103206     | 1:400            |
| CD3                                                       | Percp-cy5.5 | 17A2        | BioLegend                 | 100218     | 1:200            |
| CD3                                                       | PE          | 17A2        | BioLegend                 | 100205     | 1:400            |
| CD4                                                       | AF700       | GK1.5       | BioLegend                 | 100430     | 1:400            |
| CD45                                                      | BV711       | 30-F11      | BioLegend                 | 103147     | 1:1000           |
| CD8a                                                      | PE/Cy7      | 53-6.7      | BioLegend                 | 100722     | 1:200            |
| CD8a                                                      | APC         | 53-6.7      | BioLegend                 | 100712     | 1:200            |
| CD11b                                                     | APC/Cy7     | M1/70       | BioLegend                 | 101226     | 1:200            |
| CD11c                                                     | PE          | N418        | BioLegend                 | 117308     | 1:200            |
| CD16/32                                                   | -           | S17011E     | BioLegend                 | 156604     | 1:200            |
| F4/80                                                     | APC         | BM8         | BioLegend                 | 123130     | 1:400            |
| IFN $\gamma$ R1(CD119)                                    | PE          | 2E2         | ThermoFisher              | A16396     | 1:200            |
| IFN $\gamma$ R1(CD119)                                    | PE          | GIR-94      | BioLegend                 | 308704     | 1:200            |
| IFN $\gamma$ R1(CD119)                                    | PE          | GIR-208     | BioLegend                 | 308606     | 1:200            |
| Ly6C                                                      | BV421       | 1A8         | BioLegend                 | 127628     | 1:200            |
| Ly6G                                                      | BV605       | HK1.4       | BioLegend                 | 128035     | 1:200            |
| MHCII                                                     | BV510       | M5/114.15.2 | BioLegend                 | 107636     | 1:1000           |
| NK1.1                                                     | Percp       | PK136       | BioLegend                 | 108725     | 1:200            |
| PD-1                                                      | PE/Cy7      | 29F.1A12    | BioLegend                 | 135216     | 1:200            |
| PD-L1(CD274)                                              | PE          | 10F.9G2     | BioLegend                 | 124308     | 1:200            |
| H-2Kd/H-2Dd                                               | PE          | 34-1-2S     | BioLegend                 | 114708     | 1:100            |
| IgG2a,k isotype Ctrl                                      | PE          | MOPC-173    | BioLegend                 | 400212     | 1:100            |
| Human CD119                                               | PE          | GIR-208     | BioLegend                 | 308606     | 1:100            |
| <b>Antibodies (Flow Cytometry-Intracellular staining)</b> |             |             |                           |            |                  |
| Foxp3                                                     | FITC        | FJK-16s     | BioLegend                 | 11-5773-82 | 1:200            |
| Foxp3                                                     | eFluor506   | FJK-16s     | ThermoFisher              | 69-5773-82 | 1:200            |
| GzmB                                                      | PE          | NGZB        | ThermoFisher              | 12-8898-82 | 1:200            |
| GzmB                                                      | APC         | NGZB        | ThermoFisher              | 17-8898-82 | 1:200            |
| IFN $\gamma$                                              | FITC        | XMG1.2      | BioLegend                 | 505806     | 1:100            |
| IFN $\gamma$ R1(CD119)                                    | PE          | 2E2         | Abcam                     | ab95673    | 1:100            |
| PD-L1(CD274)                                              | PE          | 10F.9G2     | BioLegend                 | 124308     | 1:200            |
| <b>Antibodies (Western Blot-Primary antibodies)</b>       |             |             |                           |            |                  |
| ARF6                                                      | -           | D12G6       | Cell Signaling Technology | 5740s      | 1:1000           |
| a-tubulin                                                 | -           | DM1A        | Cell Signaling Technology | 3873s      | 1:1000           |
| ARF1                                                      | -           | -           | Invitrogen                | PA1-127    | 1:1000           |
| GAPDH                                                     | -           | D16H11      | Cell Signaling Technology | 5174       | 1:10000          |
| IFN $\gamma$ R1                                           | -           | EPR24127-89 | Abcam                     | ab280353   | 1:1000           |
| IFN $\gamma$ R1                                           | -           | D-3         | Santa Cruz Biotechnology  | SC-28363   | 1:1000           |
| IDO                                                       | -           | D5J4E       | Cell Signaling Technology | 86630S     | 1:1000           |
| IDO                                                       | -           | D8W5E       | Cell Signaling Technology | 5185S      | 1:1000           |
| CD80                                                      | -           | E6J6N       | Cell Signaling Technology | 54521S     | 1:1000           |

|                                                       |   |          |                           |             |                                    |
|-------------------------------------------------------|---|----------|---------------------------|-------------|------------------------------------|
| JAK1                                                  | - | 6G4      | Cell Signaling Technology | 3344S       | 1:1000                             |
| p-JAK1(Tyr1034/1035)                                  | - | D7N4Z    | Cell Signaling Technology | 74129S      | 1:1000                             |
| Lamp1                                                 | - | D2D11    | Cell Signaling Technology | 9091S       | 1:1000                             |
| PD-L1                                                 | - | D4H1Z    | Cell Signaling Technology | 60475S      | 1:1000                             |
| PD-L1                                                 | - | E1L3N    | Cell Signaling Technology | 13684S      | 1:1000                             |
| STAT1                                                 | - | D1K9Y    | Cell Signaling Technology | 14994S      | 1:1000                             |
| p-STAT1(Tyr701)                                       | - | D4A7     | Cell Signaling Technology | 7649S       | 1:1000                             |
| LSEctin                                               | - | EPR13724 | Abcam                     | ab181196    | 1:1000                             |
| Galectin-3/LGALS3                                     | - | -        | Cell Signaling Technology | 12733S      | 1:1000                             |
| Galectin-3/LGALS3                                     | - | D4I2R    | Cell Signaling Technology | 87985S      | 1:1000                             |
| CYTH1                                                 | - | 2E11     | ThermoFisher              | MA1-060     | 1:1000                             |
| DYKDDDDK Tag                                          | - | D6W5B    | Cell Signaling Technology | 14793S      | 1:1000                             |
| <b>Antibodies (Western Blot-Secondary antibodies)</b> |   |          |                           |             |                                    |
| IgG                                                   | - |          | Jackson ImmunoResearch    | 715-035-152 | 1:5000                             |
| IgG                                                   | - |          | Jackson ImmunoResearch    | 711-035-152 | 1:5000<br>(1:10000 only for GAPDH) |

## Chemical Compounds

| Chemical compound               | Vendor            | Catalog#  |
|---------------------------------|-------------------|-----------|
| Recombinant Murine IFN $\gamma$ | PeproTech         | 315-05    |
| Recombinant Human IFN $\gamma$  | PeproTech         | 300-02    |
| Bafilomycin A1                  | Sigma-Aldrich     | SML1661   |
| MG132                           | MedChemExpress    | HY-13259  |
| QS11                            | Tocris Bioscience | 3324      |
| SecinH3                         | MedChem Express   | HY-100559 |

## Oligonucleotides

### Oligonucleotides (qRT-PCR)

|                                                  |                              |
|--------------------------------------------------|------------------------------|
| <i>Ifn<math>\gamma</math>r1</i> Forward sequence | 5'-CTTGAACCCTGTCGTATGCTGG-3' |
| <i>Ifn<math>\gamma</math>r1</i> Reverse sequence | 5'-TTGGTGCAGGAATCAGTCCAGG-3' |
| <i>Gapdh</i> Forward sequence                    | 5'-AGGTCGGTGTGAACGGATTTG-3'  |

*Gapdh* Reverse sequence 5'- TGTAGACCATGTAGTTGAGGTCA-3'

*Pd-11(Cd274)* Forward sequence 5'-GCTCCAAAGGACTTGTACGTG-3'

*Pd-11(Cd274)* Reverse sequence 5'- TGATCTGAAGGGCAGCATTTC-3'

*Ido1* Forward sequence 5'-GGGCTTCTTCCTCGTCTCTC-3'

*Ido1* Reverse sequence 5'-TGGATACAGTGGGGATTGCT-3'

---

### **Oligonucleotides (PCR)**

*Arf6* Forward sequence 5'- TGAGGCATACACCATTATTGCTCC -3'

*Arf6* Reverse sequence 5'- GTAATAGCAGTGTAAATGTTCCAGTTG -3'

---



Supplementary Table 5. Gene expression markers for distinguishing immune cell lineages.

| Cell Type                       | Identity Genes                                                                                 | Exclusion Genes                           |
|---------------------------------|------------------------------------------------------------------------------------------------|-------------------------------------------|
| B cell <sup>1</sup>             | <i>Cd45, B220(Cd45r), Cd19, Cd38</i> , either <i>immunoglobulin (Ig)</i>                       | <i>IgD</i>                                |
| CD4 <sup>+</sup> 2              | <i>Cd45, Cd3, Cd4</i>                                                                          | <i>Cd8</i>                                |
| CD8 <sup>+</sup> 2              | <i>Cd45, Cd3, Cd8</i>                                                                          | <i>Cd4</i>                                |
| DC <sup>3</sup>                 | <i>Cd45, Itgax (CD11c), Mhcll</i>                                                              | <i>Cd3, Adgre1(F4/80)</i>                 |
| Macrophage <sup>4-7</sup>       | <i>Cd45, Itgam (Cd11b), Csf1r(Cd115), Adgre1(F4/80), Cd68</i>                                  |                                           |
| MDSC-PMN <sup>8-9</sup>         | <i>Cd45, Ly6G, Cd11b, Cd84, Cd244, Cd36</i>                                                    |                                           |
| Mono/Mac <sup>4-7</sup>         | <i>Cd45, Itgam (Cd11b), Csf1r(Cd115), Adgre1(F4/80), Cd68, Ly6c, Cd62l</i>                     |                                           |
| Monocyte <sup>4-7</sup>         | <i>Cd45, Ly6c, Itgam (Cd11b), Csf1r(Cd115)</i>                                                 |                                           |
| Naïve B cell <sup>1</sup>       | <i>Cd45, Cd19, IgD</i>                                                                         |                                           |
| Neutrophil <sup>8</sup>         | <i>Cd45, Ly6G, Cd11b(Itgam), Ly6c<sup>Low</sup></i>                                            | <i>Csf1r(Cd115), Adgre1(F4/80), Cd144</i> |
| NK <sup>10</sup>                | <i>Cd45, NK1.1</i>                                                                             |                                           |
| Treg <sup>2</sup>               | <i>Cd45, Cd3, Cd4, Foxp3</i>                                                                   | <i>Cd8</i>                                |
| CD8_EarlyActive <sup>2</sup>    | <i>Cd45, Cd3, Cd8, Pd-1<sup>Low/Intermediate</sup></i>                                         | <i>Cd4</i>                                |
| CD8_EffectorMemory <sup>2</sup> | <i>Cd45, Cd3, Cd8, Gzm, Pd-1<sup>Low/Intermediate</sup></i>                                    | <i>Cd4</i>                                |
| CD8_NaïveLike <sup>2</sup>      | <i>Cd45, Cd3, Cd8, CD62L, CCR7, LFA-1</i>                                                      | <i>Cd44</i>                               |
| Tfh <sup>2</sup>                | <i>Cd45, Cd3, Cd4, Cxcr5, Tox, Slamf6</i>                                                      | <i>Cd8</i>                                |
| Th1 <sup>2</sup>                | <i>Cd45, Cd3, Cd4, Ifngr1, Fasl</i>                                                            | <i>Cd8</i>                                |
| CD8_Tex <sup>2</sup>            | <i>Cd45, Cd3, Cd8, Gzm<sup>Hi</sup>, PD-1</i><br>either <i>Ctla4, Lag3, Tigit, Havcr2/Tim3</i> | <i>Cd4</i>                                |
| CD8_Tpex <sup>2</sup>           | <i>Cd45, Cd3, Cd8, Gzm<sup>Low</sup>, PD-1, Tcf7, Ctla4, Tox</i>                               | <i>Cd4</i>                                |
| CD4_Naive_Like <sup>2</sup>     | <i>Cd45, Cd3, Cd4, Tcf7, Ccr7</i>                                                              | <i>Cd8, Pd-1 and Tnfrsf9/4-1bb</i>        |

Identity genes for validation in Single R and ProjecTIL data sets. The abbreviations used in the table are as follows: *B220* (*B-lymphocyte antigen 220*), *Cd* (*Cluster of Differentiation*), *Ig* (*Immunoglobulin*), *DC* (*Dendritic Cell*), *Itgax* (*Integrin alpha X*), *Mhcll* (*Major Histocompatibility Complex Class II*), *Itgam* (*Integrin alpha M*), *Adgre1* (*Adhesion G protein-coupled receptor E1*), *Csf1r* (*Colony stimulating factor 1 receptor*), MDSC-PMN (*Myeloid-Derived Suppressor Cell – Polymorphonuclear*), Mono (*Monocyte*), Mac (*Macrophage*), *Foxp3* (*Forkhead box P3*), *NK* (*Natural Killer*), *Treg* (*Regulatory T cell*), *Tfh* (*T follicular helper cell*), *Th1* (*T helper 1 cell*), *Pd-1* (*Programmed cell death protein 1*), *Gzm* (*Granzyme*), *Ccr7* (*C-C chemokine receptor type 7*), *LFA-1* (*Lymphocyte*

*function-associated antigen 1), Cxcr5 (C-X-C chemokine receptor type 5), Tox (Thymocyte selection-associated high mobility group box protein), Slamf6 (Signaling lymphocytic Activation Molecule Family Member 6), Ifngr1 (Interferon gamma receptor 1), FasL (Fas ligand), Ctla4 (Cytotoxic T-lymphocyte-associated protein 4), Lag3 (Lymphocyte-activation gene 3), Tigit (T cell immunoreceptor with Ig and Itim domains), Havcr2/Tim3 (Hepatitis A virus cellular receptor 2, also known as T cell immunoglobulin and mucin domain-containing protein 3), Tcf7 (Transcription factor 7), and Tnfrsf9/4-1bb (Tumor necrosis factor receptor superfamily member 9).*

## References:

1. Shinall, S. M., Gonzalez-Fernandez, M., Noelle, R. J., & Waldschmidt, T. J. Identification of Murine Germinal Center B Cell Subsets Defined by the Expression of Surface Isotypes and Differentiation Antigens. *Journal of Immunology*, **164**, 5729-5738 (2000).
2. Andreatta, M. *et al.* Interpretation of T cell states from single-cell transcriptomic data using reference atlases. *Nat. Commun.* **12**, 2965 (2021).
3. Reynolds, G., & Haniffa, M. Human and Mouse Mononuclear Phagocyte Networks: A Tale of Two Species? *Frontiers in Immunology*, **6**, 330 (2015).
4. Guillemins, M., Ginhoux, F., Jakubzick, C., *et al.* Dendritic cells, monocytes and macrophages: a unified nomenclature based on ontogeny. *Nature Reviews Immunology*, **14**, 571–578 (2014).
5. Cassetta, L., Noy, R., Swierczak, A., Sugano, G., Smith, H., Wiechmann, L., & Pollard, J. W. Isolation of Mouse and Human Tumor-Associated Macrophages. *Advances in Experimental Medicine and Biology*, **899**, 211-229 (2016).
6. Yu, Y. R., O'Koren, E. G., Hotten, D. F., Kan, M. J., Kopin, D., Nelson, E. R., Que, L., & Gunn, M. D. A Protocol for the Comprehensive Flow Cytometric Analysis of Immune Cells in Normal and Inflamed Murine Non-Lymphoid Tissues. *PLoS One*, **11**, e0150606 (2016)
7. Laviron, M., Combadière, C., & Boissonnas, A. Tracking Monocytes and Macrophages in Tumors With Live Imaging. *Frontiers in Immunology*, **10**, 1201 (2019).
8. Veglia, F., Sanseviero, E., & Gabrilovich, D. I. Myeloid-derived suppressor cells in the era of increasing myeloid cell diversity. *Nature Reviews Immunology*, **21**, 485–498 (2021)
9. Vanhaver, C., van der Bruggen, P., & Bruger, A. M. MDSC in Mice and Men: Mechanisms of Immunosuppression in Cancer. *Journal of Clinical Medicine*, **10**, 2872 (2021).
10. Riggan, L., Shah, S., & O'Sullivan, T. E. Arrested development: suppression of NK cell function in the tumor microenvironment. *Clinical and Translational Immunology*, **10**, e1238 (2021).
